# Supplementary material
Source: PubMed Central journal article supplement (PMC11114840)
Supplement: 18_2011_896_MOESM1_ESM.pdf [file 18_2011_896_MOESM1_ESM.pdf]

**Variants in *SNAP25* are targets of natural selection and influence verbal performances in women**

**Rachele Cagliani<sup>1</sup>, Stefania Riva<sup>1</sup>, Cecilia Marino<sup>1</sup>, Matteo Fumagalli<sup>1</sup>, Maria Grazia D'Angelo<sup>1</sup>, Valentina Riva<sup>2</sup>, Giacomo P. Comi<sup>3</sup>, Uberto Pozzoli<sup>1</sup>, Diego Forni<sup>1</sup>, Mario Cáceres<sup>4,5</sup>, Nereo Bresolin<sup>1,3</sup>, Mario Clerici<sup>6,7</sup>, Manuela Sironi<sup>1</sup>**

**ELECTRONIC SUPPLEMENTARY MATERIAL**

**Figure 1.** GENETREE analysis of the *SNAP25* gene region carrying rs363039.

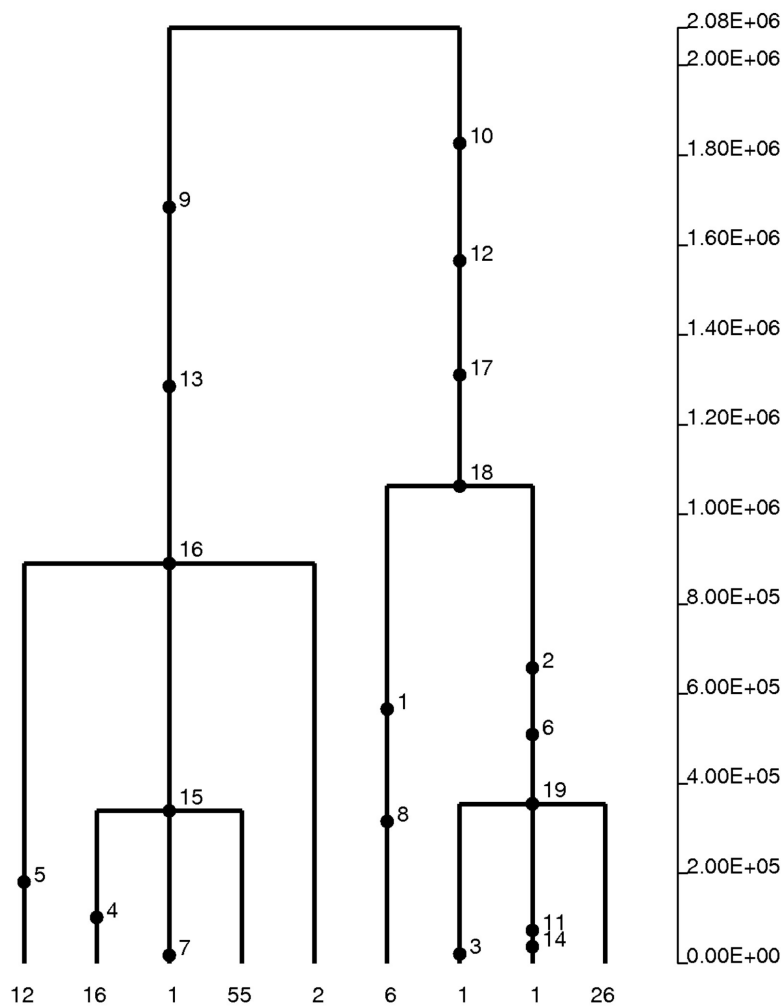

**Table 1.** Neuromuscular cohort. Age, FIQ, VIQ and PIQ are reported separately for males and females and divided on the basis of disease

| Disease                  | Limb-girdle muscular dystrophy | Spinal muscular atrophy | Facioscapulo humeral muscular dystrophy | Congenital myopathy | Hereditary peripheral neuropathy | All            |
|--------------------------|--------------------------------|-------------------------|-----------------------------------------|---------------------|----------------------------------|----------------|
| <b>Males (n)</b>         | 22                             | 4                       | 3                                       | 4                   | 3                                | 36             |
| <b>Females (n)</b>       | 15                             | 3                       | 4                                       | 5                   | 7                                | 34             |
| <b>Males, age (SD)</b>   | 27.23 (13.95)                  | 12.75 (5.5)             | 27 (6.8)                                | 26.25 (10.76)       | 36.33 (11.72)                    | 26.25 (14.01)  |
| <b>Females, age (SD)</b> | 30.44 (15.15)                  | 21.33 (16.8)            | 31.25 (9.31)                            | 20.8 (9.23)         | 30.86 (20.82)                    | 28.46 (16.97)  |
| <b>Males, FIQ (SD)</b>   | 101.5 (12.88)                  | 103.05 (17.75)          | 96.00 (14.11)                           | 95.50 (27.39)       | 82.67 (6.43)                     | 99.03 (15.36)  |
| <b>Females, FIQ (SD)</b> | 97.93 (13.63)                  | 95.33 (4.04)            | 100.50 (2.52)                           | 101.40 (9.79)       | 103.67 (9.81)                    | 99.59 (10.63)  |
| <b>Males, VIQ (SD)</b>   | 100.55 (13.25)                 | 101.74 (14.71)          | 97.33 (13.01)                           | 95.75 (29.5)        | 87.67 (3.51)                     | 98.81 (14.96)  |
| <b>Females, VIQ (SD)</b> | 97.13 (15.49)                  | 94.33 (6.43)            | 98.50 (5.80)                            | 97 (5.72)           | 107.57 (13.19)                   | 98.67 (13.13)  |
| <b>Males, PIQ (SD)</b>   | 103.09 (16.56)                 | 104.50 (23.53)          | 92.33 (10.69)                           | 97.25 (23.60)       | 80.33 (17.21)                    | 99.80 (12.18)  |
| <b>Females, PIQ (SD)</b> | 102.2 (13.69)                  | 98.67 (11.06)           | 103.50 (5.92)                           | 108.25 (16.50)      | 107.45 (7.13)                    | 101.94 (11.56) |

**Table 2.** Results for the MLHKA test performed over the *SNP25* gene region where rs363039 is located.

| Fixed substitutions | MLHKA          |                        |                |                        |                |                        |
|---------------------|----------------|------------------------|----------------|------------------------|----------------|------------------------|
|                     | YRI            |                        | CEU            |                        | EAS            |                        |
|                     | k <sup>a</sup> | p                      | k <sup>a</sup> | p                      | k <sup>a</sup> | p                      |
| 30                  | 3.89           | 1.60x 10 <sup>-3</sup> | 4.46           | 4.74x 10 <sup>-4</sup> | 4.46           | 4.42x 10 <sup>-4</sup> |

<sup>a</sup> selection parameter (k>1 indicates an excess of polymorphism compared to divergence; k< 1 indicates the opposite situation)

**Table 3. Association analysis of rs363043, rs6039787 and rs3787297 with cognitive performance in the child cohorts**

| SNP              | age group      | Sex (n)          | Test         | Score (SD)   |              |              | F    | P    |
|------------------|----------------|------------------|--------------|--------------|--------------|--------------|------|------|
| <b>rs363043</b>  | 3-8 years      | Males<br>(81)    | V/I          | <b>CC</b>    | <b>CT</b>    | <b>TT</b>    | 0.88 | 0.42 |
|                  |                |                  | Block        | 9.65 (2.39)  | 10.28 (3.16) | 10.79 (3.29) |      |      |
|                  | 3-8 years      | Females<br>(104) | V/I          | 12.12 (2.82) | 11.86 (3.44) | 10.14 (4.29) | 1.8  | 0.17 |
|                  |                |                  | Block        | 9.38 (2.66)  | 9.78 (2.92)  | 9.57 (3.82)  | 0.23 | 0.79 |
|                  | 9-12 years     | Males<br>(81)    | V/I          | 11.50 (2.96) | 10.87 (3.50) | 12.57 (1.90) | 1.09 | 0.34 |
|                  |                |                  | Block        | 8.69 (3.55)  | 8.70 (3.01)  | 8.40 (4.51)  | 0.02 | 0.98 |
|                  | 9-12 years     | Females<br>(75)  | V/I          | 10.43 (3.44) | 11.11 (2.95) | 13.00 (4.42) | 1.46 | 0.24 |
|                  |                |                  | Block        | 9.09 (3.77)  | 8.11 (2.76)  | 9.00 (3.65)  | 0.73 | 0.49 |
|                  | combined       | Males<br>(189)   | V/I          | 10.73 (2.98) | 10.92 (2.97) | 10.29 (1.98) | 0.20 | 0.82 |
|                  |                |                  | Block        | 9.16 (3.05)  | 9.39 (3.15)  | 10.16 (3.67) | 0.74 | 0.48 |
|                  | combined       | Females<br>(179) | V/I          | 11.26 (3.24) | 11.44 (3.17) | 10.89 (4.40) | 0.20 | 0.82 |
|                  |                |                  | Block        | 9.27 (3.07)  | 9.11 (2.96)  | 9.29 (3.60)  | 0.06 | 0.94 |
| <b>rs6039787</b> | 3-8 years      | Males<br>(81)    | V/I          | <b>CC</b>    | <b>CT</b>    | <b>TT</b>    | 0.97 | 0.38 |
|                  |                |                  | Block        | 10.18 (3.05) | 9.27 (1.74)  | 13.00 (n.a.) |      |      |
|                  | 3-8 years      | Females<br>(104) | V/I          | 11.28 (3.40) | 12.91 (2.84) | 14.00 (n.a.) | 1.39 | 0.26 |
|                  |                |                  | Block        | 9.64 (2.82)  | 9.00 (3.19)  | n.a.         | 0.56 | 0.45 |
|                  | 9-12 years     | Males<br>(108)   | V/I          | 11.18 (3.15) | 10.62 (3.28) | n.a.         | 0.36 | 0.55 |
|                  |                |                  | Block        | 8.23 (3.36)  | 9.50 (2.47)  | n.a.         | 1.58 | 0.21 |
|                  | 9-12 years     | Females<br>(75)  | V/I          | 10.40 (3.50) | 10.67 (2.31) | n.a.         | 0.06 | 0.80 |
|                  |                |                  | Block        | 8.84 (3.09)  | 6.43 (3.46)  | n.a.         | 3.72 | 0.06 |
|                  | combined       | Males<br>(189)   | V/I          | 10.78 (2.56) | 10.86 (1.95) | n.a.         | 0.01 | 0.94 |
|                  |                |                  | Block        | 9.06 (3.36)  | 9.39 (2.10)  | 13.00 (n.a.) | 0.83 | 0.44 |
|                  | combined       | Females<br>(179) | V/I          | 10.78 (3.47) | 11.74 (2.78) | 14.00 (n.a.) | 1.21 | 0.30 |
|                  |                |                  | Block        | 9.32 (2.95)  | 8.10 (3.43)  | n.a.         | 2.86 | 0.09 |
| <b>rs3787297</b> | 3-8 years      | Males<br>(81)    | V/I          | <b>CC</b>    | <b>CT</b>    | <b>TT</b>    | 1.13 | 0.32 |
|                  |                |                  | Block        | 10.06 (3.08) | 9.64 (2.42)  | 12.00 (2.94) |      |      |
|                  | 3-8 years      | Females<br>(104) | V/I          | 11.08 (3.44) | 12.05 (3.17) | 14.00 (1.41) | 1.82 | 0.17 |
|                  |                |                  | Block        | 9.45 (2.76)  | 9.88 (2.96)  | 9.25 (4.56)  | 0.23 | 0.79 |
|                  | 9-12 years     | Males<br>(108)   | V/I          | 11.24 (3.30) | 11.08 (2.28) | 9.00 (5.35)  | 0.95 | 0.39 |
|                  |                |                  | Block        | 8.52 (3.57)  | 8.06 (2.66)  | 10.00 (3.61) | 0.58 | 0.56 |
|                  | 9-12 years     | Females<br>(75)  | V/I          | 10.26 (3.85) | 10.85 (2.48) | 10.33 (2.08) | 0.33 | 0.71 |
|                  |                |                  | Block        | 8.94 (3.12)  | 7.67 (3.31)  | n.a.         | 2.01 | 0.14 |
|                  | combined       | Males<br>(189)   | V/I          | 10.98 (2.44) | 10.28 (2.61) | n.a.         | 1.03 | 0.31 |
|                  |                |                  | Block        | 9.22 (3.43)  | 8.68 (2.66)  | 11.14 (3.13) | 1.99 | 0.14 |
|                  | combined       | Females<br>(179) | V/I          | 10.63 (3.68) | 11.32 (2.80) | 12.43 (2.51) | 1.48 | 0.23 |
|                  |                |                  | Block        | 9.24 (2.91)  | 8.98 (3.26)  | 9.25 (4.57)  | 0.11 | 0.89 |
| combined         | Males<br>(189) | V/I              | 11.13 (2.97) | 10.75 (2.42) | 9.00 (5.35)  | 1.23         | 0.30 |      |
|                  |                | Block            | 9.24 (2.91)  | 8.98 (3.26)  | 9.25 (4.57)  | 0.11         | 0.89 |      |

Abbreviations: V/I, Vocabulary/Information; block, Block design; P, uncorrected P value; n.a., not available
